# Supplementary material
Source: Springer Nature journal article supplement (https://www.springermedizin.de/resource/supplementary/12967_2014_1821_MOESM2_ESM.pdf/9574908)

**A**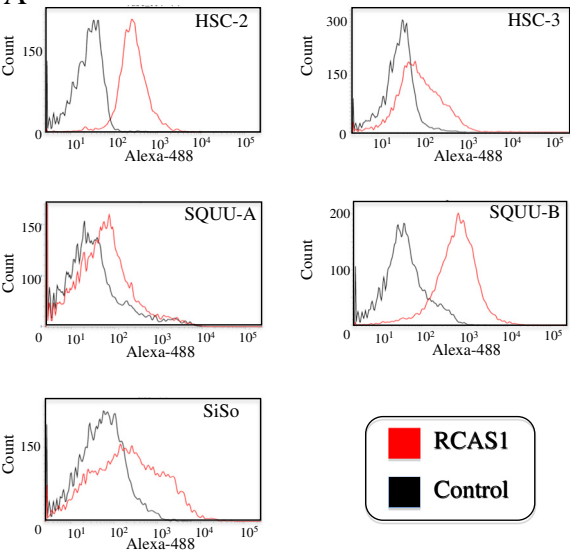**B**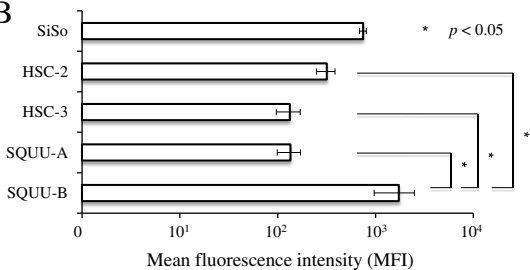

Supplement: MOESM2 [file 9574908]
